# Supplementary figures and images for: Random walk numerical simulation for hopping transport at finite carrier concentrations: diffusion coefficient and transport energy concept
Source: Royal Society of Chemistry journal article supplement (doi:10.1039/b912935a), 2009-01-01

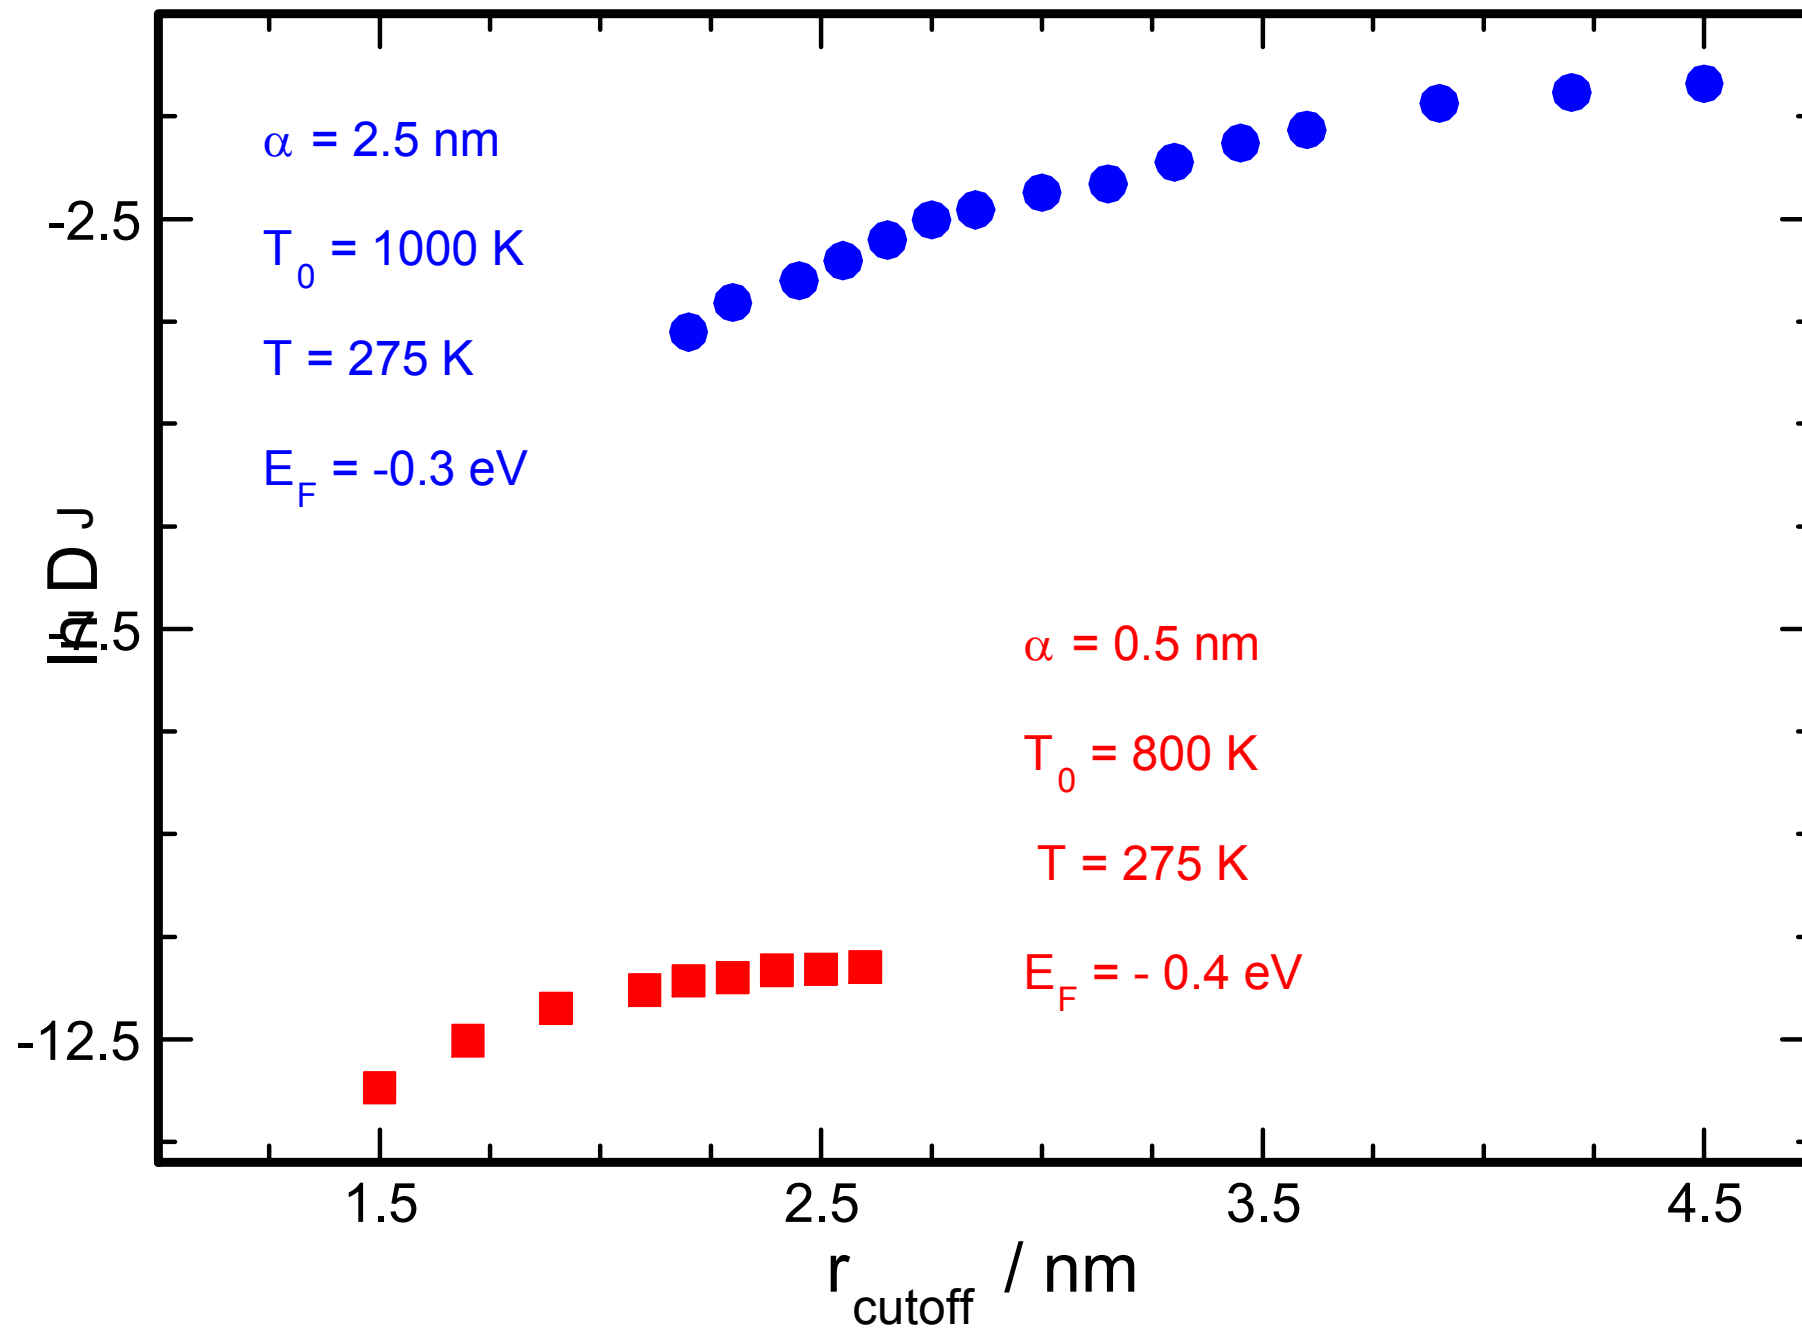

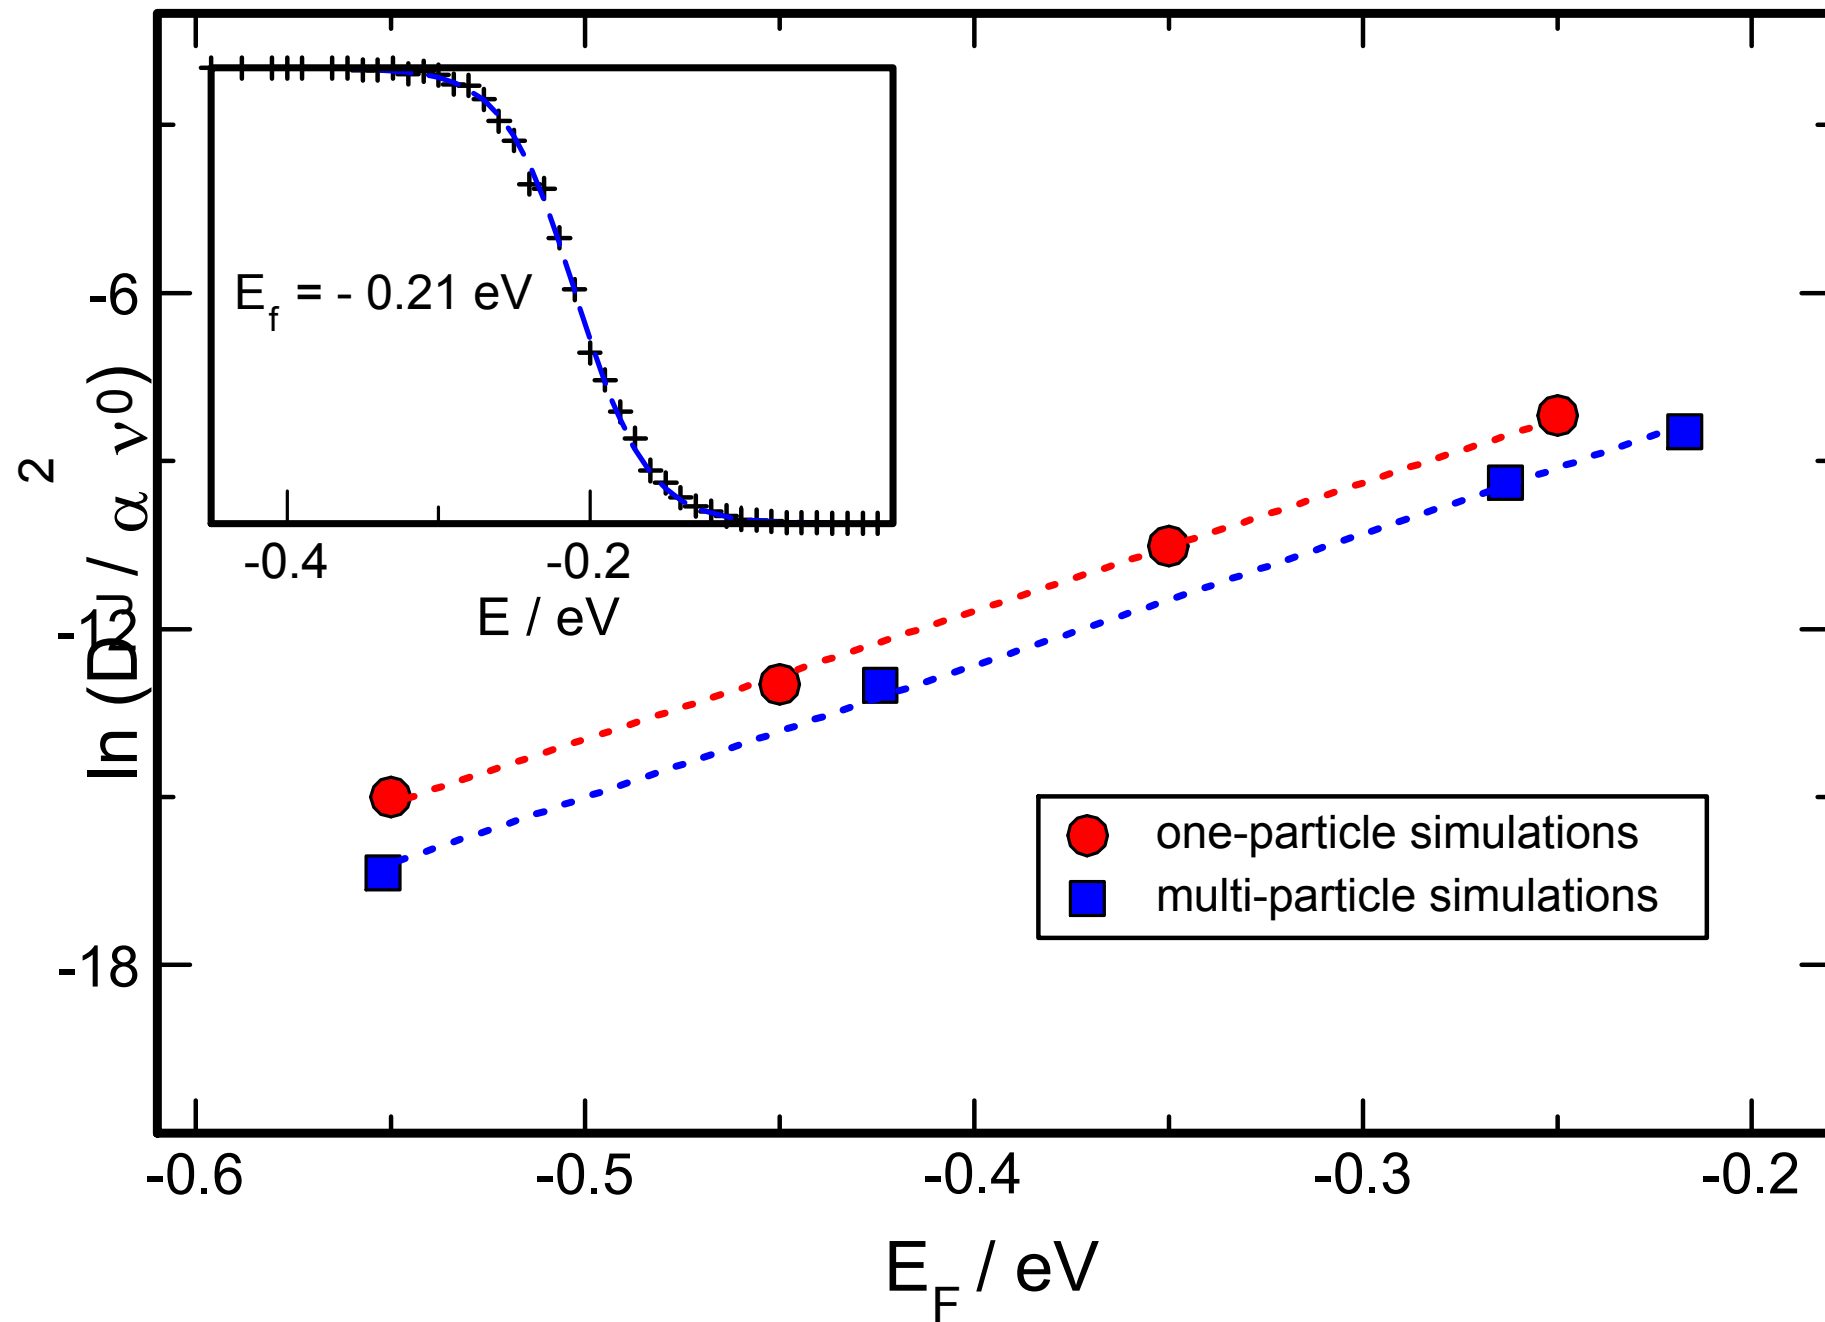

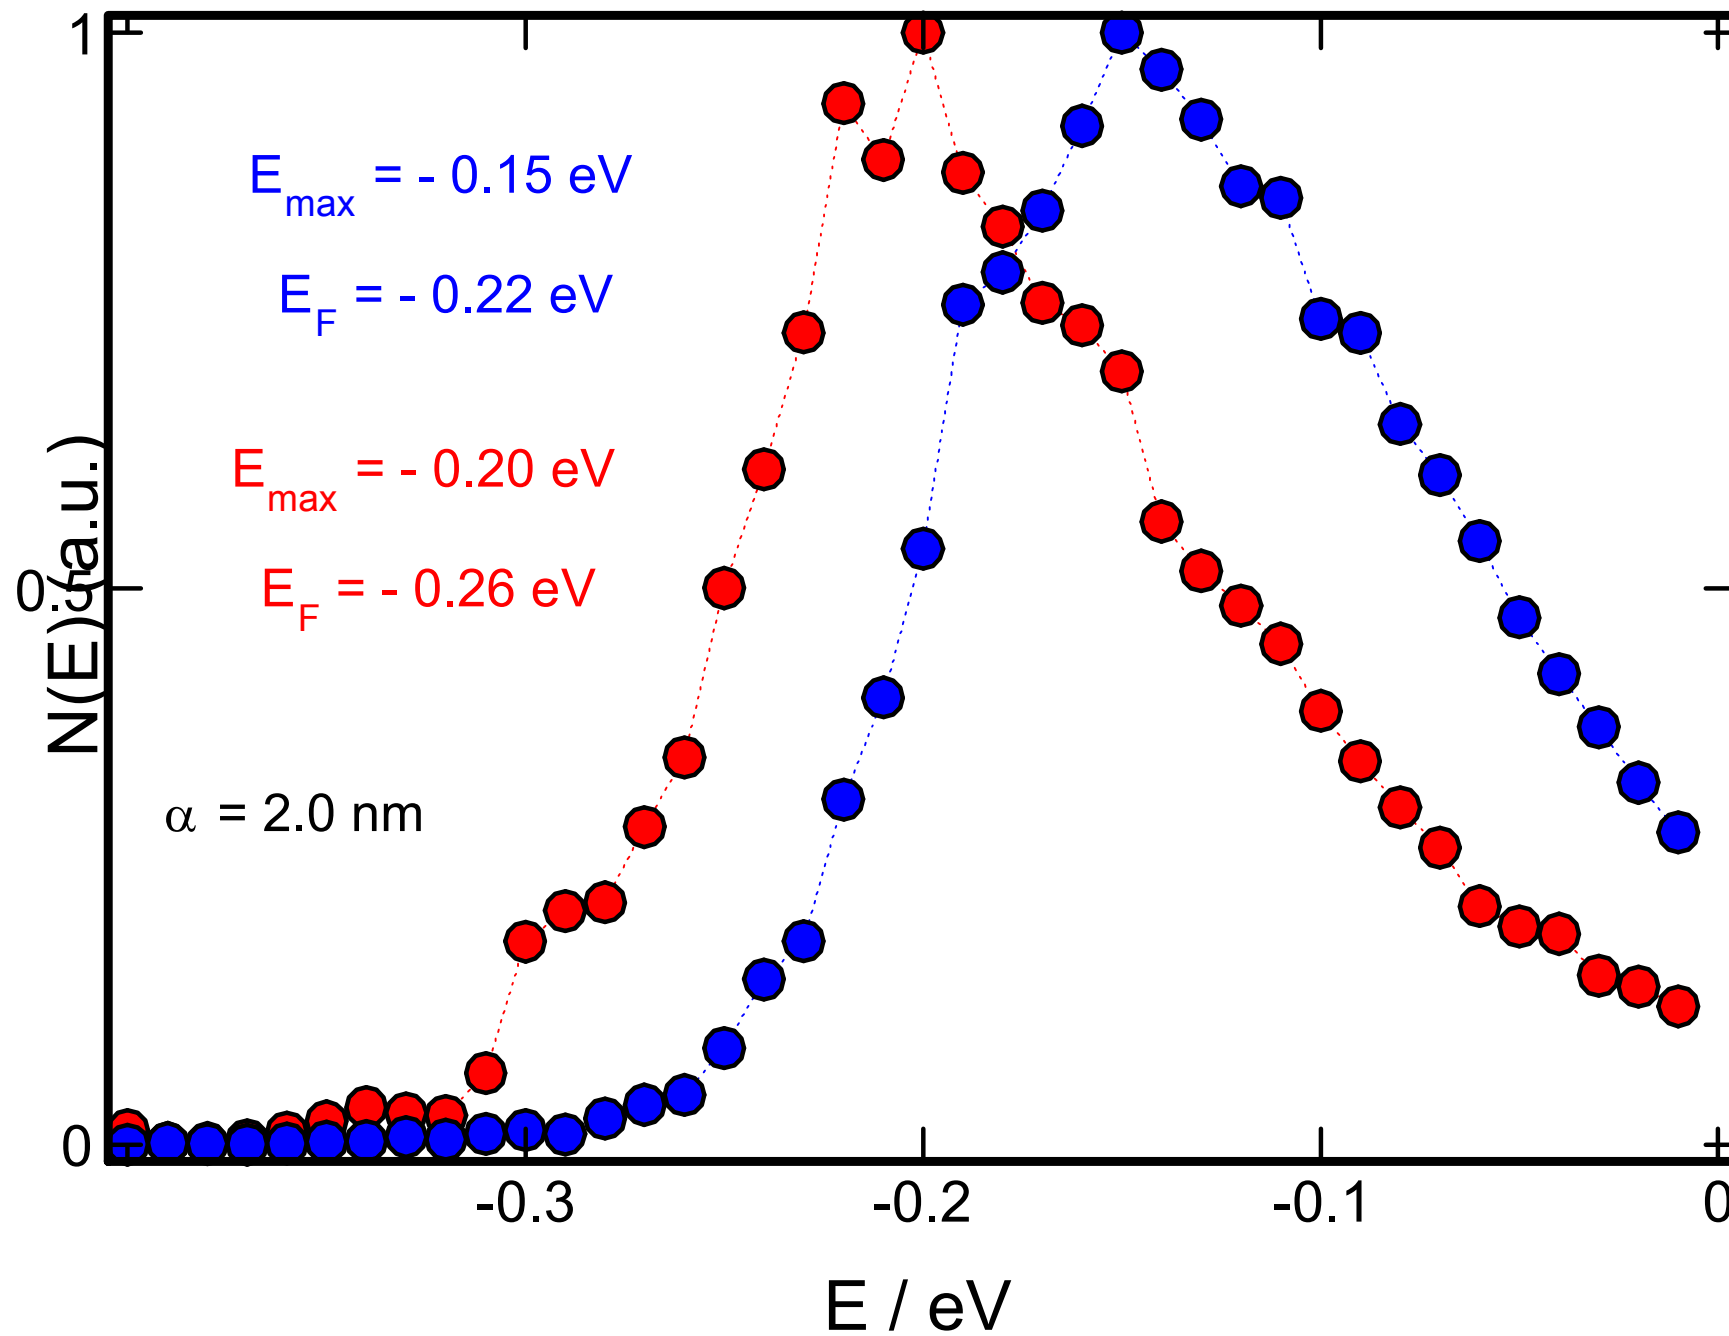

Supplement: b912935a.pdf [file b912935a.pdf]
